# Supplementary material for: Nutritional Composition and In Vitro Ruminal Digestibility of Crabgrass (Digitaria sanguinalis (L.) Scop.) in Monoculture or Interseeded with Cowpea (Vigna unguiculata (L.) Walp) and Lablab (Lablab purpureus (L.) Sweet)
Source: MDPI journal article supplement (doi:10.3390/ani13142305), 2023-07-14
Supplement: s1 [file s1]

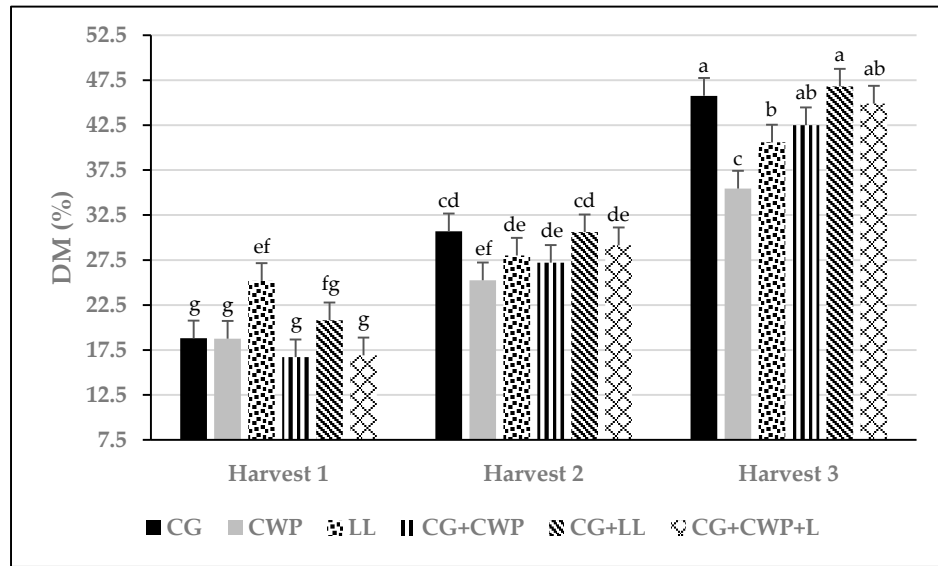

**Figure S1.** Interactions between forage treatments and harvest on DM concentration (%). CG= Crabgrass; CWP= cowpea; LL = lablab; CG+CWP = crabgrass + cowpea; CG+LL = crabgrass + lablab; CG+CWP+LL = crabgrass + cowpea + lablab. <sup>a-g</sup>Means with different letters differ ( $p \leq 0.05$ ). Vertical bars indicate standard errors of the mean.

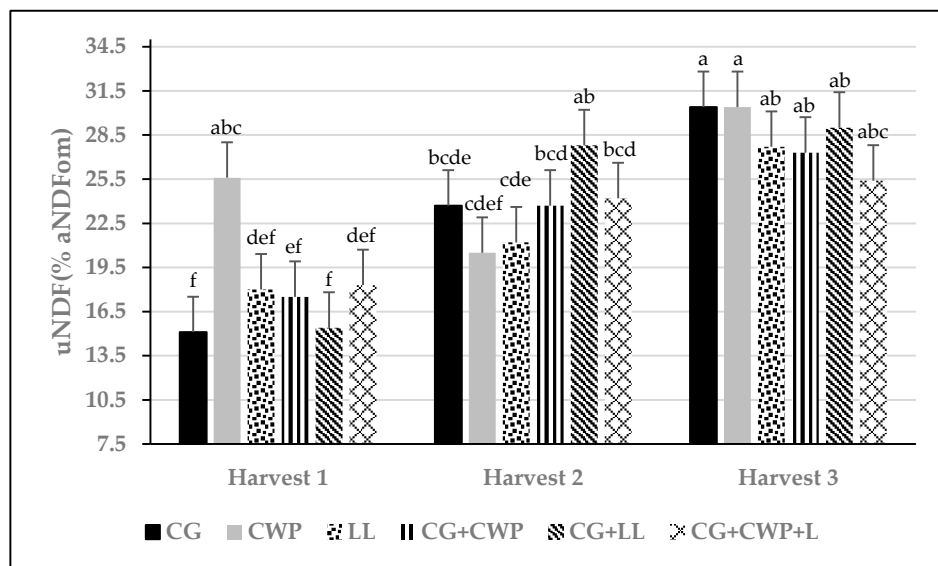

**Figure S2.** Interactions between forage treatments and harvest on uNDF concentration (% of aNDFom). CG= Crabgrass; CWP= cowpea; LL = lablab; CG+CWP = crabgrass + cowpea; CG+LL = crabgrass + lablab; CG+CWP+LL = crabgrass + cowpea + lablab. <sup>a-f</sup>Means with different letters differ ( $p \leq 0.05$ ). Vertical bars indicate standard errors of the mean.
